# Supplementary material for: PTEN deficiency is associated with reduced sensitivity to mTOR inhibitor in human bladder cancer through the unhampered feedback loop driving PI3K/Akt activation
Source: PubMed Central journal article supplement — Br J Cancer. 2013 Aug 29;109(6):1586–92. doi: 10.1038/bjc.2013.505 (PMC3777009; doi:10.1038/bjc.2013.505), 2013-08-29
Supplement: bjc2013505x2.pdf [file bjc2013505x2.pdf]

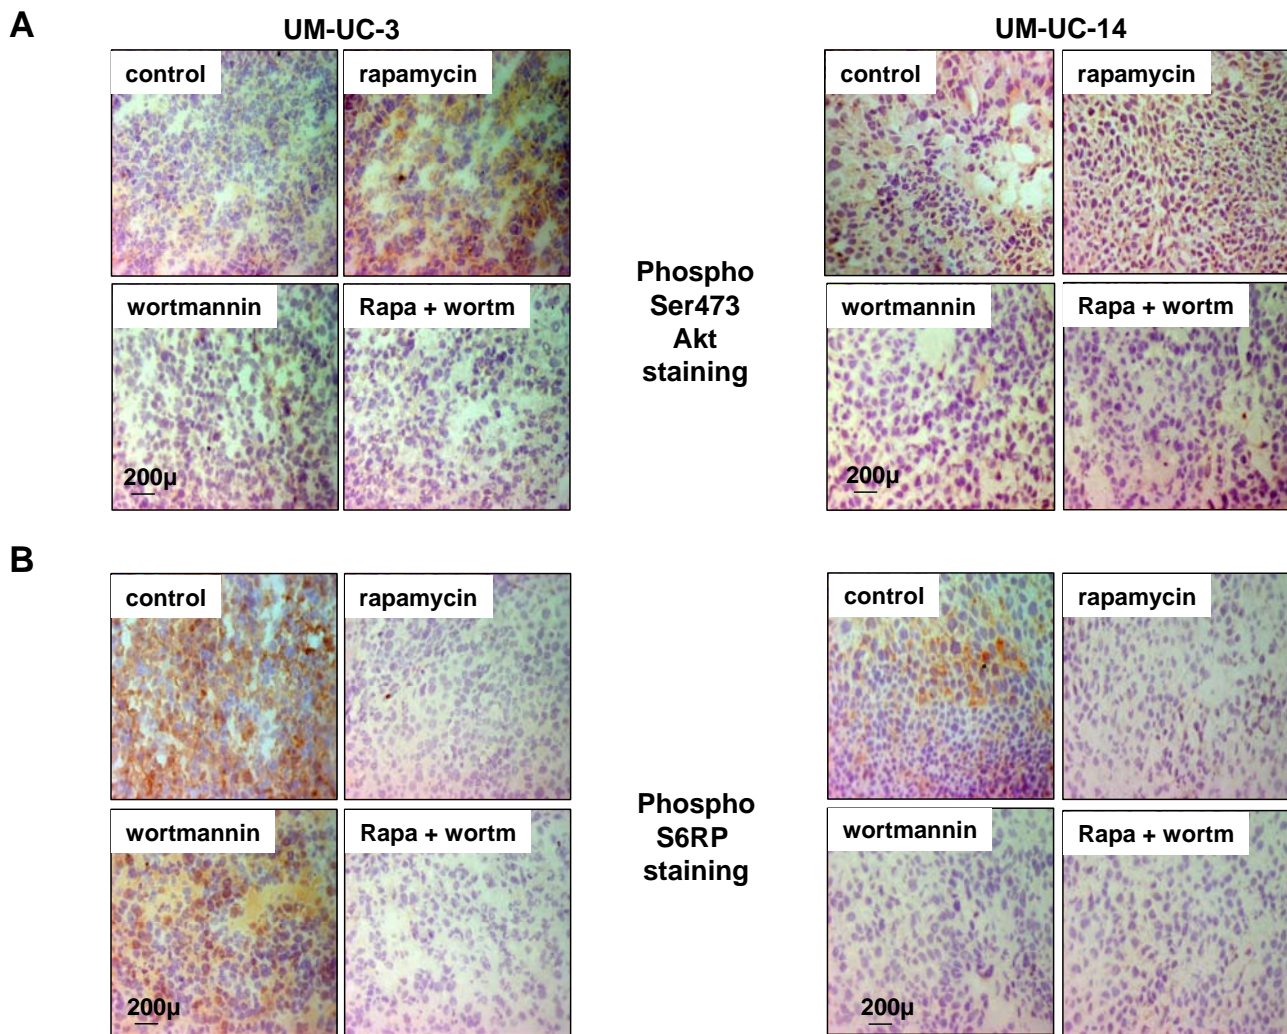

Representative immunostaining (brown) for (A.) phospho-Ser473 Akt and (B.) phospho-Ser235/236 S6RP in sections of UM-UC3 (left) and UM-UC-14 (right) tumors; hematoxylin-eosin was used as counterstain.
