# Supplementary figures and images for: PTEN deficiency is associated with reduced sensitivity to mTOR inhibitor in human bladder cancer through the unhampered feedback loop driving PI3K/Akt activation
Source: PubMed Central journal article supplement — Br J Cancer. 2013 Aug 29;109(6):1586–92. doi: 10.1038/bjc.2013.505 (PMC3777009; doi:10.1038/bjc.2013.505), 2013-08-29

# Supplementary Figure 1

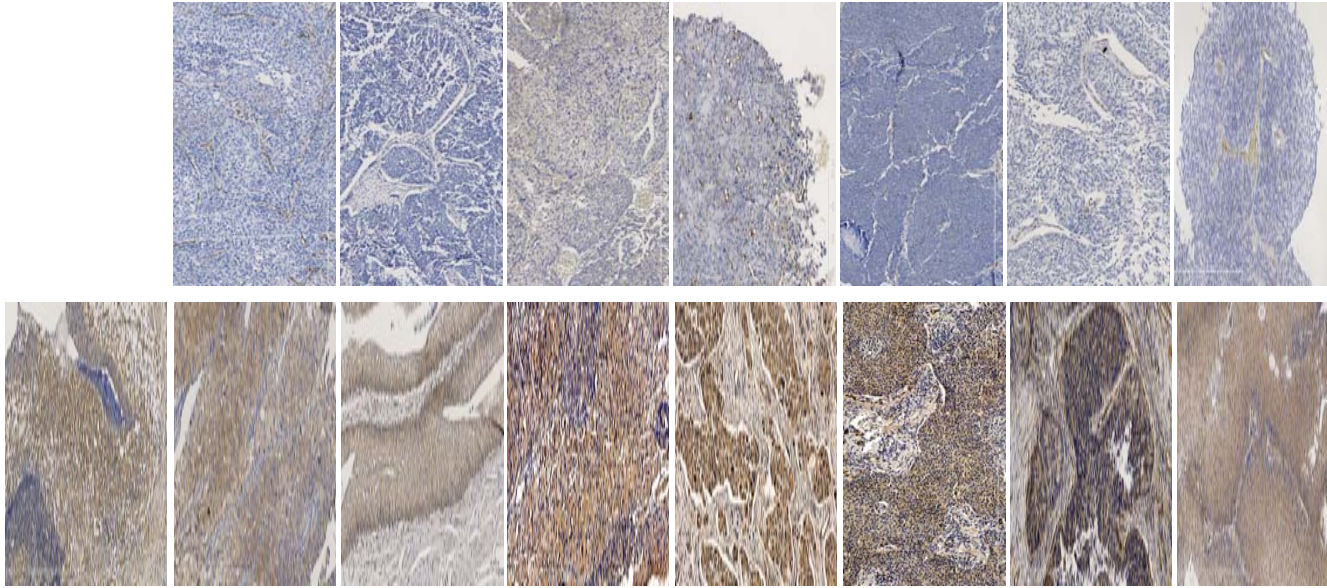

PTEN immunostaining of tumor sections from 15 TCC patients.

Supplement: bjc2013505x1.pdf [file bjc2013505x1.pdf]
